# Supplementary material for: Inequality in health opportunities in Indonesia: long-term influence of early-life circumstances on health
Source: Springer Nature journal article supplement (doi:10.1186/s12889-022-13714-8), 2022-07-12
Supplement: MOESM1 [file 23264448]

# Supplementary file

## A Appendix

### A.1 Definition of wealth

Wealth is defined as the aggregated total value of the following various assets commonly found in typical Indonesian households: House and land occupied by a household; Other houses/building (including land); Land (not used for farming); Poultry; Livestock/fish pond; Hard stem plant not used for farming, or a non-farm business; Vehicles (cars, boats, bicycles, motorbikes); Household appliances (radio, tape-recorder, television, fridge, sewing or washing machine, video and CD player, cell phone, etc.); Savings/certificates for deposits/stocks; Receivables; Jewellery; Household furniture and utensils.

### A.2 Supplementary results

Table A.1: Descriptive statistics of health outcomes

|                  | count | mean | sd   |
|------------------|-------|------|------|
| Underweight      | 5523  | 0.11 | 0.31 |
| Overweight/obese | 5523  | 0.30 | 0.46 |
| Hypertension     | 5481  | 0.11 | 0.31 |
| Diabetes         | 1148  | 0.04 | 0.19 |

Table A.2: Descriptive statistics of circumstances

|                                                      | mean   | sd   |
|------------------------------------------------------|--------|------|
| Paternal BMI in childhood                            | 21.23  | 2.72 |
| Maternal BMI in childhood                            | 21.87  | 3.24 |
| Paternal height in childhood                         | 158.81 | 6.68 |
| Maternal height in childhood                         | 150.06 | 5.23 |
| Paternal education years                             | 6.96   | 3.61 |
| Maternal education years                             | 5.91   | 3.57 |
| ln(Wealth) in childhood                              | 12.63  | 2.57 |
| Books 11-25                                          | 0.15   | 0.36 |
| Books 26-100                                         | 0.06   | 0.23 |
| Books 101-200                                        | 0.01   | 0.09 |
| Books 200-                                           | 0.00   | 0.06 |
| Had hunger                                           | 0.04   | 0.20 |
| Javanese                                             | 0.42   | 0.49 |
| Male                                                 | 0.47   | 0.50 |
| Islam                                                | 0.90   | 0.31 |
| Hindu                                                | 0.05   | 0.22 |
| Catholic                                             | 0.01   | 0.10 |
| Family size in childhood                             | 5.82   | 1.94 |
| Teenage pregnancy                                    | 0.12   | 0.33 |
| Mother married at age 12                             | 0.95   | 0.21 |
| Biological mother at age 12                          | 0.97   | 0.18 |
| Biological father at age 12                          | 0.93   | 0.26 |
| Electricity                                          | 0.65   | 0.48 |
| Clean water                                          | 0.12   | 0.33 |
| Clean toilet                                         | 0.25   | 0.44 |
| Sanitation                                           | 0.14   | 0.35 |
| Finished wall                                        | 0.47   | 0.50 |
| Finished floor                                       | 0.58   | 0.49 |
| Finished roof                                        | 0.92   | 0.28 |
| Number of rooms                                      | 4.60   | 1.96 |
| Father self-employed worker                          | 0.54   | 0.50 |
| Mother self-employed worker                          | 0.23   | 0.42 |
| Mother government worker                             | 0.11   | 0.31 |
| Father government worker                             | 0.04   | 0.21 |
| Mother private sector worker                         | 0.31   | 0.46 |
| Father private sector worker                         | 0.09   | 0.29 |
| Mother family worker                                 | 0.01   | 0.08 |
| Father family worker                                 | 0.17   | 0.38 |
| Mother primary industry                              | 0.41   | 0.49 |
| Father primary industry                              | 0.23   | 0.42 |
| Mother secondary industry                            | 0.09   | 0.28 |
| Father secondary industry                            | 0.29   | 0.45 |
| Mother service industry                              | 0.27   | 0.44 |
| Father service industry                              | 0.23   | 0.42 |
| Knowledge of public hospitals                        | 0.66   | 0.47 |
| Knowledge of private hospitals                       | 0.31   | 0.46 |
| Knowledge of health centres                          | 0.94   | 0.24 |
| Knowledge of private clinics                         | 0.13   | 0.34 |
| Knowledge of private physicians                      | 0.47   | 0.50 |
| Knowledge of nurses/paramedics/midwife practitioners | 0.71   | 0.45 |
| Urban in childhood                                   | 0.40   | 0.49 |
| North Sumatra                                        | 0.09   | 0.28 |
| West Sumatra                                         | 0.05   | 0.22 |
| South Sumatra                                        | 0.06   | 0.24 |
| Lampung                                              | 0.06   | 0.23 |
| West Java                                            | 0.14   | 0.35 |
| Central Java                                         | 0.14   | 0.35 |
| Yogyakarta                                           | 0.04   | 0.19 |
| East Java                                            | 0.12   | 0.32 |
| Bali                                                 | 0.06   | 0.23 |
| West Nusa Tenggara                                   | 0.09   | 0.29 |
| South Kalimantan                                     | 0.05   | 0.22 |
| South Sulawesi                                       | 0.05   | 0.22 |
| Observations                                         | 5563   |      |

Table A.3: Descriptive statistics of efforts

|                       | mean  | sd   |
|-----------------------|-------|------|
| Education years       | 11.02 | 3.42 |
| ln(Wealth)            | 16.50 | 1.81 |
| ln(food expenditure)  | 12.90 | 0.63 |
| Prepared food ratio   | 0.15  | 0.19 |
| Staple food ratio     | 0.18  | 0.15 |
| Vigorous activity     | 2.36  | 5.76 |
| Moderate activity     | 5.77  | 7.44 |
| Instant noodle freq.  | 1.95  | 1.95 |
| Fast food freq.       | 0.25  | 0.78 |
| Soft drink freq.      | 0.50  | 1.19 |
| Fried snacks freq.    | 2.39  | 2.53 |
| Sweet snacks ferq.    | 2.13  | 2.53 |
| Piped water           | 0.55  | 0.50 |
| Clean toilet          | 0.75  | 0.43 |
| Basic sanitation      | 0.37  | 0.48 |
| Self-employed worker  | 0.22  | 0.41 |
| Government worker     | 0.05  | 0.22 |
| Private sector worker | 0.35  | 0.48 |
| Family worker         | 0.07  | 0.26 |
| Primary industry      | 0.16  | 0.37 |
| Secondary industry    | 0.16  | 0.37 |
| Service industry      | 0.45  | 0.50 |
| Safe fuel use         | 0.74  | 0.44 |
| Observations          | 5563  |      |

Table A.4: Association between health and circumstances

|                                                      | (1)         | (2)        | (3)          | (4)        |
|------------------------------------------------------|-------------|------------|--------------|------------|
|                                                      | Underweight | Overweight | Hypertension | Diabetes   |
| Paternal BMI in childhood                            | -0.0136***  | 0.0204***  | 0.00364**    | 0.000689   |
| Maternal BMI in childhood                            | -0.00835*** | 0.0228***  | 0.00728***   | 0.00193    |
| Paternal height in childhood                         | -0.00100    | 0.000883   | 0.000368     | 0.000271   |
| Maternal height in childhood                         | -0.00184**  | -0.000165  | -0.000119    | 0.000287   |
| Paternal education years                             | 0.00122     | -0.00200   | -0.00178     | -0.00384   |
| Maternal education years                             | 0.00382**   | -0.000461  | 0.00108      | 0.00256    |
| ln(Wealth) in childhood                              | 0.00123     | -0.00187   | -0.00310*    | 0.00396    |
| Books 11-25                                          | 0.0242**    | -0.0129    | -0.0135      | -0.0100    |
| Books 26-100                                         | 0.00628     | 0.0163     | 0.0180       | 0.000210   |
| Books 101-200                                        | 0.0215      | 0.00183    | -0.0605      | 0.168**    |
| Books 200-                                           | -0.0336     | 0.0814     | -0.0812      | -0.0201    |
| Had hunger                                           | -0.0238     | 0.0339     | -0.0153      | -0.0148    |
| Javanese                                             | 0.00417     | -0.0194    | -0.0150      | 0.0292     |
| Male                                                 | 0.0660***   | -0.177***  | 0.0454***    | -0.0201*   |
| Islam                                                | 0.0477**    | -0.00765   | 0.0168       | 0.0405     |
| Hindu                                                | 0.0496      | -0.0148    | 0.00740      | 0.151**    |
| Catholic                                             | 0.0566      | 0.00429    | 0.00177      | 0.0269     |
| Family size in childhood                             | 0.00220     | -0.00776** | 0.00128      | 0.000679   |
| Teenage pregnancy                                    | -0.0170     | 0.0243     | -0.00256     | -0.00943   |
| Mother married at age 12                             | -0.0129     | -0.0351    | 0.0226       | -0.0118    |
| Biological mother at age 12                          | -0.0309     | 0.0797**   | 0.0125       | 0.0549     |
| Biological father at age 12                          | 0.0254      | 0.0124     | -0.0179      | -0.0512    |
| Electricity                                          | 0.00555     | 0.0142     | -0.0186      | -0.00991   |
| Clean water                                          | 0.0100      | -0.0162    | 0.00362      | -0.0119    |
| Clean toilet                                         | 0.00959     | -0.00298   | 0.0146       | 0.000877   |
| Sanitation                                           | 0.0106      | -0.0386*   | 0.00703      | 0.0141     |
| Finished wall                                        | -0.00776    | -0.0271*   | -0.0131      | 0.00609    |
| Finished floor                                       | 0.0126      | 0.0288*    | -0.00982     | -0.0148    |
| Finished roof                                        | 0.0209      | -0.0325    | 0.0160       | 0.00737    |
| Number of rooms                                      | -0.00867*** | 0.00781**  | 0.00622**    | 0.000330   |
| Father self-employed worker                          | 0.0736      | -0.104     | 0.0280       | 0.0129     |
| Mother self-employed worker                          | 0.110       | -0.258     | -0.0965      | -0.00542   |
| Mother government worker                             | 0.0978      | -0.142     | 0.0127       | 0.00159    |
| Father government worker                             | 0.0885      | -0.269     | -0.103       | -0.0124    |
| Mother private sector worker                         | 0.0670      | -0.0960    | 0.0387       | 0.0180     |
| Father private sector worker                         | 0.109       | -0.246     | -0.120       | -0.0279    |
| Mother family worker                                 | 0.141       | -0.120     | 0.0369       | -0.0157    |
| Father family worker                                 | 0.114       | -0.228     | -0.101       | 0.0168     |
| Mother primary industry                              | -0.0376     | 0.155      | 0.00827      | 0.0223     |
| Father primary industry                              | -0.148      | 0.309*     | 0.100        | -0.00153   |
| Mother secondary industry                            | -0.122      | 0.300*     | 0.0897       | 0          |
| Father secondary industry                            | -0.0216     | 0.154      | -0.00330     | 0.0266     |
| Mother service industry                              | -0.0398     | 0.159      | -0.0106      | 0.000817   |
| Father service industry                              | -0.126      | 0.286      | 0.104        | 0.0104     |
| Knowledge of public hospitals                        | -0.0164*    | 0.0121     | -0.00347     | -0.0200    |
| Knowledge of private hospitals                       | -0.00244    | -0.00423   | -0.0162      | -0.00273   |
| Knowledge of health centres                          | 0.00153     | -0.0227    | -0.00313     | -0.00117   |
| Knowledge of private clinics                         | -0.00156    | 0.0134     | 0.0189       | -0.00365   |
| Knowledge of private physicians                      | -0.0158     | 0.0226     | 0.000168     | 0.0112     |
| Knowledge of nurses/paramedics/midwife practitioners | 0.0126      | 0.000261   | 0.00290      | -0.00376   |
| Urban in childhood                                   | -0.00383    | 0.0461***  | 0.00969      | 0.00931    |
| North Sumatra                                        | -0.0130     | -0.0520    | -0.0325      | 0.0641     |
| West Sumatra                                         | 0.0156      | 0.00815    | -0.0385      | 0.0323     |
| South Sumatra                                        | 0.00545     | -0.0242    | -0.0430      | 0.0903**   |
| Lampung                                              | -0.00811    | -0.0667*   | -0.0355      | 0.0539     |
| West Java                                            | 0.0193      | -0.0152    | -0.000518    | 0.00501    |
| Central Java                                         | -0.00520    | -0.0400    | 0.00441      | -0.0000913 |
| Yogyakarta                                           | 0.0196      | -0.0165    | -0.00630     | -0.0103    |
| East Java                                            | 0.00799     | -0.0162    | 0.00290      | 0.0619     |
| Bali                                                 | -0.0444     | 0.0305     | -0.0458      | -0.0679    |
| West Nusa Tenggara                                   | 0.0535**    | -0.142***  | -0.0266      | 0.00824    |
| South Kalimantan                                     | 0.0224      | -0.0190    | 0.0508*      | 0.00240    |
| South Sulawesi                                       | 0.0146      | -0.0700*   | -0.0377      | 0.144***   |
| Constant                                             | 0.881***    | -0.693***  | -0.214       | -0.230     |
| Observations                                         | 5523        | 5523       | 5481         | 1148       |
| R-squared                                            | 0.0585      | 0.119      | 0.0256       | 0.0789     |

Marginal effects are shown

\*  $p < 0.1$ , \*\*  $p < 0.05$ , \*\*\*  $p < 0.01$

Table A.5: Association between health and efforts

|                       | (1)         | (2)        | (3)          | (4)      |
|-----------------------|-------------|------------|--------------|----------|
|                       | Underweight | Overweight | Hypertension | Diabetes |
| Education years       | 0.0219***   | -0.0318*** | -0.00664     | -0.00644 |
| ln(wealth)            | -0.0137     | 0.000288   | -0.00164     | 0.0341*  |
| ln(food expenditure)  | -0.0479     | 0.205***   | 0.0145       | 0.0584   |
| Prepared food ratio   | 0.0300      | -0.184     | 0.0325       | -0.121   |
| Staple food ratio     | -0.105      | -0.584     | -0.414       | -0.443   |
| Vigorous exercise     | 0.0157***   | -0.0333*** | -0.000733    | 0.00192  |
| Moderate exercise     | -0.0119***  | 0.0298***  | 0.00672      | -0.00666 |
| Instant noodle        | 0.0816***   | -0.104***  | 0.00929      | -0.00121 |
| Fast food             | -0.0856     | 0.171**    | 0.0919*      | 0.0456   |
| Soft drink            | -0.0572*    | 0.0523     | -0.00900     | -0.0276  |
| Fried snacks          | 0.00553     | 0.0143     | 0.0130       | -0.0240* |
| Sweet snacks          | 0.0236      | -0.0337    | -0.0412***   | 0.000941 |
| Clean water           | -0.0371     | 0.00607    | 0.0446       | -0.0133  |
| Clean toilet          | -0.0386     | 0.0767     | 0.0298       | -0.103   |
| Sanitation            | -0.0521     | 0.0976     | 0.00719      | 0.0214   |
| Self-employed worker  | -0.121      | 0.185*     | 0.169**      | 0.0570   |
| Government worker     | -0.106      | 0.125      | 0.140        | -0.0635  |
| Private sector worker | 0.0287      | 0.0741     | 0.184**      | -0.0391  |
| Family worker         | 0.171*      | 0.130      | -0.00381     | 0.264**  |
| Private industry      | 0.0402      | -0.297***  | 0.00115      | -0.0902  |
| Secondary industry    | 0.168*      | -0.213     | -0.122       | 0.120    |
| Service industry      | 0.143*      | -0.290**   | -0.0710      | -0.191*  |
| Safe fuel use         | -0.119***   | 0.130**    | -0.0930**    | 0.0753   |
| Constant              | 0.633       | -1.732**   | 0.0130       | -0.848   |
| Observations          | 5504        | 5504       | 5462         | 1143     |
| R-squared             | 0.0291      | 0.0685     | 0.0124       | 0.0310   |

Marginal effects are shown

\*  $p < 0.1$ , \*\*  $p < 0.05$ , \*\*\*  $p < 0.01$
